# Supplementary material for: A hollow Mo/HZSM-5 zeolite capsule catalyst: preparation and enhanced catalytic properties in methane dehydroaromatization
Source: Royal Society of Chemistry journal article supplement (doi:10.1039/c7ta02345f), 2017-01-01
Supplement: c7ta02345f1.pdf [file c7ta02345f1.pdf]

## Electronic Supplementary Information (ESI)

# Hollow Mo/HZSM-5 Zeolite Capsule Catalyst: Preparation and Enhanced Catalytic Properties in Methane Dehydroaromatization

Pengfei Zhu,<sup>a,b</sup> Guohui Yang,<sup>b</sup> Jian Sun,<sup>\*c</sup> Ronggang Fan,<sup>d</sup> Peipei Zhang,<sup>b</sup> Yoshiharu

Yoneyama,<sup>b</sup> and Noritatsu Tsubaki<sup>\*b</sup>

<sup>a</sup> *School of Environmental Science and Engineering, Shaanxi University of Science and Technology, Xian 710021, PR China*

<sup>b</sup> *Department of Applied Chemistry, School of Engineering, University of Toyama, Gofuku 3190, Toyama 930-8555, Japan*

<sup>c</sup> *Dalian National Laboratory for Clean Energy (DNL), Dalian Institute of Chemical Physics, Chinese Academy of Sciences, Dalian 116023, PR China*

<sup>d</sup> *ShinkaCo. Ltd., Gofuku 3383-4, Toyama 930-8555, Japan*

\*Corresponding authors:

E-mail: (J. Sun) sunj@dicp.ac.cn; (N. Tsubaki) tsubaki@eng.u-toyama.ac.jp

### SEM images of the HZSM-5 and Silicalite-1 zeolite

The crystal sizes of the HZSM-5 and Silicalite-1 used for preparation of Mo/S-Z-M catalyst are 1  $\mu\text{m}$  and 3-5  $\mu\text{m}$ , respectively, as displayed in Figure S1.

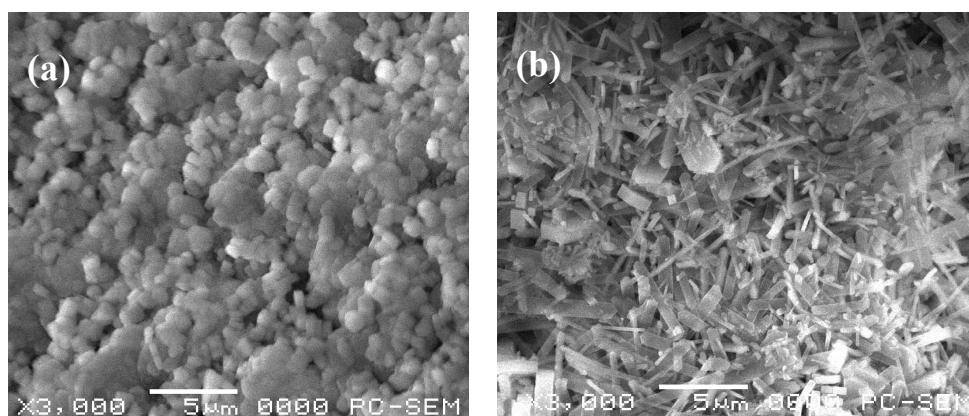

*Figure S1* SEM images of the HZSM-5 (a) and Silicalite-1 (b)
